# Supplementary material for: The Mitochondrial Chaperone Protein TRAP1 Mitigates α-Synuclein Toxicity
Source: PubMed Central journal article supplement (PMC3271059; doi:10.1371/journal.pgen.1002488), 2012-02-02
Supplement: pgen.1002488.s009.pdf [file pgen.1002488.s009.pdf]

**Table S1.** List of deficiencies identified to cause haploinsufficiency with *ddc>A53T*

| <b>Deficiency</b>      | <b>Candidate region</b> | <b>Genes in deleted region</b> | <b>Genes analyzed</b> | <b>Confirmed synthetic haploinsufficiency</b> |
|------------------------|-------------------------|--------------------------------|-----------------------|-----------------------------------------------|
| <i>Df(1)dx81</i>       | 5C3-6C12                | 122                            | 62 (51%)              | <i>kdn</i>                                    |
| <i>Df(1)BK10</i>       | 15F2-16C10              | 51                             | 36 (69%)              | -                                             |
| <i>Df(2L)Exel6011*</i> | 25C7-25D5               | 31                             | 15 (48%)              | -                                             |
| <i>Df(3L)h-i22</i>     | 66D10-66D12             | 13                             | 12 (92%)              | -                                             |
| <i>Df(3R)e-R1*</i>     | 93B7-93D3               | 51                             | 39 (76%)              | -                                             |

\* These deficiencies cause synthetic haploinsufficiencies with various other disease models (but not with driver only controls). Consequently, the focus of our analysis was on the remaining candidates.
