# Supplementary material for: The Mitochondrial Chaperone Protein TRAP1 Mitigates α-Synuclein Toxicity
Source: PubMed Central journal article supplement (PMC3271059; doi:10.1371/journal.pgen.1002488), 2012-02-02
Supplement: pgen.1002488.s010.pdf [file pgen.1002488.s010.pdf]

**Table S2.** List of deficiencies identified to cause semi-lethality

| <b>Deficiency</b>   | <b>Candidate region</b> | <b>Confirmed semi-lethality</b> |
|---------------------|-------------------------|---------------------------------|
| <i>Df(1)64c18</i>   | 2E1-2;3C2               | SL                              |
| <i>Df(1)JC19</i>    | 2F6;3C5                 | SL                              |
| <i>Df(1)N-8</i>     | 3C2-3;3E3-4             | SL                              |
| <i>Df(1)dm75e19</i> | 3C11;3E4                | SL                              |
| <i>Df(1)N73</i>     | 5C2;5D5-6               | SL                              |
| <i>Df(1)g</i>       | 12A3-10;12E9            | SL                              |
| <i>Df(1)RR79</i>    | 16C;16F                 | SL                              |
| <i>Df(3L)AC1</i>    | 67A2;67D11-13           | SL                              |
| <i>Df(4)ED6366</i>  | 102A1;102A6             | SL                              |
