# Supplementary material for: The Mitochondrial Chaperone Protein TRAP1 Mitigates α-Synuclein Toxicity
Source: PubMed Central journal article supplement (PMC3271059; doi:10.1371/journal.pgen.1002488), 2012-02-02
Supplement: pgen.1002488.s011.pdf [file pgen.1002488.s011.pdf]

**Table S3.** Detailed summary of analyzed genes located within deficiencies causing a haploinsufficiency in combination with *ddc>A53T*

| <b>Deficiency <i>Df(1)dx81 (5C3-10;6C3-12)</i></b> |                              |                  |                    |                 |
|----------------------------------------------------|------------------------------|------------------|--------------------|-----------------|
| <b>Cytological location</b>                        | <b>GENE NUMBER/<br/>NAME</b> | <b>CG NUMBER</b> | <b>Vienna RNAi</b> | <b>BL Stock</b> |
| 5C2-5C3                                            | <i>CG15765</i>               | <i>CG15765</i>   |                    | 18597           |
| 5C3-5C3                                            | <i>CG11462</i>               | <i>CG11462</i>   |                    |                 |
| 5C3-5C3                                            | <i>CG12729</i>               | <i>CG12729</i>   |                    |                 |
| 5C5-5C5                                            | <i>CG15764</i>               | <i>CG15764</i>   |                    |                 |
| 5C5-5C5                                            | <i>CG3033</i>                | <i>CG3033</i>    | 7086               |                 |
| 5C5-5C5                                            | <i>mof</i>                   | <i>CG3025</i>    |                    |                 |
| 5C5-5C6                                            | <i>CG3016</i>                | <i>CG3016</i>    | 7090               |                 |
| 5C6-5C6                                            | <i>CG16721</i>               | <i>CG16721</i>   |                    |                 |
| 5C7-5C7                                            | <i>Act5C</i>                 | <i>CG4027</i>    | 7139               |                 |
| 5C7-5C7                                            | <i>CG4020</i>                | <i>CG4020</i>    |                    | 17170           |
| 5C7-5C7                                            | <i>CG12236</i>               | <i>CG12236</i>   |                    |                 |
| 5C7-5C7                                            | <i>CG3011</i>                | <i>CG3011</i>    | 19208              |                 |
| 5C7-5C10                                           | <i>CG3726</i>                | <i>CG3726</i>    |                    | 19187           |
| 5C10-5C10                                          | <i>CG12728</i>               | <i>CG12728</i>   |                    |                 |
| 5C10-5C10                                          | <i>CG32756</i>               | <i>CG32756</i>   |                    |                 |
| 5C10-5C10                                          | <i>CG6041</i>                | <i>CG6041</i>    |                    |                 |
| 5C10-5C10                                          | <i>CG32755</i>               | <i>CG32755</i>   |                    |                 |
| 5C10-5C10                                          | <i>CG6048</i>                | <i>CG6048</i>    |                    |                 |
| 5D1-5D1                                            | <i>CG6067</i>                | <i>CG6067</i>    |                    |                 |
| 5D1-5D1                                            | <i>fs(1)M3</i>               | <i>CG4790</i>    |                    |                 |
| 5D1-5D1                                            | <i>Grip</i>                  | <i>CG14447</i>   |                    | 11239           |
| 5D1-5D1                                            | <i>CG5966</i>                | <i>CG5966</i>    | 13164              |                 |
| 5D1-5D2                                            | <i>CG4766</i>                | <i>CG4766</i>    |                    |                 |
| 5D2-5D2                                            | <i>mab-21</i>                | <i>CG4746</i>    |                    | 18541           |
| 5D2-5D2                                            | <i>rux</i>                   | <i>CG4336</i>    |                    | 17867           |
| 5D2-5D2                                            | <i>CG5941</i>                | <i>CG5941</i>    |                    |                 |
| 5D2-5D3                                            | <i>CG5937</i>                | <i>CG5937</i>    |                    |                 |
| 5D3-5D3                                            | <i>CG5921</i>                | <i>CG5921</i>    | 37875              |                 |
| 5D3-5D3                                            | <i>CG5928</i>                | <i>CG5928</i>    |                    |                 |
| 5D3-5D3                                            | <i>Tsp5D</i>                 | <i>CG4690</i>    | 45740              | 10093           |
| 5D3-5D3                                            | <i>CG4666</i>                | <i>CG4666</i>    | 36293              | 12674           |
| 5D4-5D4                                            | <i>CG4660</i>                | <i>CG4660</i>    |                    |                 |
| 5D4-5D4                                            | <i>Mipp2</i>                 | <i>CG4317</i>    | 14163              | 14247           |
| 5D4-5D4                                            | <i>raptor</i>                | <i>CG4320</i>    | 13112              |                 |
| 5D4-5D5                                            | <i>Nep1</i>                  | <i>CG5905</i>    | 7108               | 15146           |
| 5D5-5D6                                            | <i>Ca-alpha1T</i>            | <i>CG15899</i>   |                    | 19179           |
| 5D8-5D8                                            | <i>CG32750</i>               | <i>CG32750</i>   |                    |                 |
| 5D8-5D8                                            | <i>CG32751</i>               | <i>CG32751</i>   |                    |                 |

|                |                        |               |              |              |
|----------------|------------------------|---------------|--------------|--------------|
| 5E1-5E1        | <i>vanin-like</i>      | CG32754       | 50591        |              |
| 5E1-5E1        | CG3599                 | CG3599        | 16665        |              |
| 5E1-5E1        | CG3774                 | CG3774        | 30238        |              |
| 5E1-5E1        | <i>sqh</i>             | CG3595        | 7916         |              |
| 5E1-5E1        | CG14446                | CG14446       | 10274        |              |
| 5E1-5E1        | CG14445                | CG14445       |              |              |
| 5E1-5E3        | CG3585                 | CG3585        |              |              |
| 5E3-5E3        | <i>Spx</i>             | CG3595        |              |              |
| 5E3-5E4        | <i>Lag1</i>            | CG3576        |              | 13138        |
| 5E3-5E3        | CG3781                 | CG3781        | 7113         |              |
| 5E4-5E4        | <i>Spt6</i>            | CG3780        | 40471        |              |
| 5E4-5E4        | CG3566                 | CG3566        |              |              |
| 5E4-5E4        | <i>Ubi-p5E</i>         | CG32744       |              | 11854        |
| 5E4-5E4        | CR32745                | CR32745       |              |              |
| 5E5-5E5        | CR11700                | CR11700       |              |              |
| 5E5-5E5        | <i>Top3beta</i>        | CG3458        | 30627        | 17226        |
| 5E5-5E5        | <i>wuho</i>            | CG15897       | 41618        |              |
| 5E5-5E5        | <i>Rpt4</i>            | CG3455        | 49574        | 12131        |
| 5E5-5E6        | CG15896                | CG15896       |              |              |
| 5E6-5E6        | CG15892                | CG15892       |              |              |
| 5E6-5E6        | CG15891                | CG15891       |              |              |
| 5E6-5E7        | CG3815                 | CG3815        |              |              |
| 5E7-5E7        | CG12219                | CG12219       |              |              |
| 5E7-5E8        | CG3823                 | CG3823        |              |              |
| 5F1-5F1        | CG15894                | CG15894       |              | 18304        |
| 5F2-5F2        | CG3842                 | CG3842        | 7117         | 19166        |
| 5F2-5F2        | CG3847                 | CG3847        |              |              |
| 5F2-5F2        | CG3446                 | CG3446        | 42696        |              |
| <b>5F2-5F4</b> | <b><i>kdn</i></b>      | <b>CG3861</b> | <b>26301</b> | <b>14436</b> |
| 5F4-5F4        | <i>swa</i>             | CR32747       |              | 18431        |
| 5F4-5F4        | <i>Marf</i>            | CG3429        |              |              |
| 5F4-5F4        | <i>PpV</i>             | CG12217       | 31690        |              |
| 5F5-5F5        | CG33664                | CG33664       |              |              |
| 5F6-5F6        | CG33669                | CG33669       |              |              |
| 6A1-6A1        | CG33668                | CG33668       |              |              |
| 6A2-6A2        | CG3367                 | CG3367        |              | 18325        |
| 6A2-6A2        | CG33667                | CG33667       |              |              |
| 6A2-6A2        | CG33666                | CG33666       |              |              |
| 6A2-6A2        | CG33665                | CG33665       | 51606        |              |
| 6A3-6A3        | CG12543                | CG12543       |              |              |
| 6B1-6B1        | <i>tRNA:CR32748-RA</i> |               |              |              |
| 6B1-6B1        | <i>tRNA:CR32748</i>    |               |              |              |
| 6B1-6B1        | CG3918                 | CG3918        |              | 19185        |
| 6B1-6B1        | CG3342                 | CG3342        |              | 18549        |
| 6B1-6B1        | <i>Spat</i>            | CG3926        |              |              |
| 6B1-6B1        | <i>RpL7A</i>           | CG3314        | 43760        | 18043        |

|                                                |                               |                  |                    |                 |
|------------------------------------------------|-------------------------------|------------------|--------------------|-----------------|
| 6B1-6B1                                        | <i>snoRNA:Or-CD10-RA</i>      |                  |                    |                 |
| 6B1-6B1                                        | <i>snoRNA:Or-CD10</i>         |                  |                    |                 |
| 6B1-6B2                                        | <i>dx</i>                     | CG3929           | 7795               |                 |
| 6B2-6B3                                        | CG34417                       | CG34417          |                    | 13234           |
| 6C1-6C1                                        | CG17717                       | CG17717          |                    |                 |
| 6C1-6C1                                        | <i>Pat1</i>                   | CG10695          | 27307              | 18059           |
| 6C1-6C1                                        | <i>APC7</i>                   | CG14444          | 17261              | 15885           |
| 6C1-6C3                                        | CG3973                        | CG3973           | 34772              | 12446           |
| 6C2-6C2                                        | CG14443                       | CG14443          |                    |                 |
| 6C3-6C3                                        | CG3226                        | CG3226           | 47034              |                 |
| 6C3-6C3                                        | <i>I(1)G0148</i>              | CG32742          |                    |                 |
| 6C3-6C4                                        | CG3224                        | CG3224           | 29561              | 11243           |
| 6C4-6C4                                        | <i>Ctr1A</i>                  | CG3977           | 46757              | 11243           |
| 6C4-6C4                                        | CG3198                        | CG3198           |                    | 15397           |
| 6C4-6C5                                        | <i>Mcm6</i>                   | CG4039           | 13661              |                 |
| 6C5-6C5                                        | CG3192                        | CG3192           | 30413              |                 |
| 6C5-6C5                                        | <i>I(1)G0255</i>              | CG4094           | 34797              |                 |
| 6C5-6C5                                        | CG4095                        | CG4095           | 47685              |                 |
| 6C6-6C6                                        | <i>Pink1</i>                  | CG4523           | 21860              |                 |
| 6C6-6C6                                        | CG3184                        | CG3184           | 25880              |                 |
| 6C6-6C7                                        | CG14442                       | CG14442          |                    | 18974           |
| 6C7-6C7                                        | CG32741                       | CG32741          |                    |                 |
| 6C7-6C7                                        | CG14440                       | CG14440          | 44474              | 12468           |
| 6C9-6C9                                        | CG14441                       | CG14441          |                    | 19335           |
| 6C9-6C10                                       | CG3168                        | CG3168           | 48010              | 12731           |
| 6C10-6C10                                      | <i>RpL17</i>                  | CG3203           | 41778              | 10994           |
| 6C10-6C10                                      | <i>snoRNA:Psi28S-3436b</i>    |                  |                    |                 |
| 6C10-6C10                                      | <i>snoRNA:Psi28S-3436b-RA</i> |                  |                    |                 |
| 6C10-6C10                                      | <i>snoRNA:Psi28S-3436a-RA</i> |                  |                    |                 |
| 6C10-6C10                                      | <i>snoRNA:Psi28S-3436a</i>    |                  |                    |                 |
| 6C10-6C10                                      | <i>snoRNA:Psi28S-1060-RA</i>  |                  |                    |                 |
| 6C10-6C10                                      | <i>snoRNA:Psi28S-1060</i>     |                  |                    |                 |
| 6C10-6C10                                      | <i>snoRNA:Psi28S-1232</i>     |                  |                    |                 |
| 6C10-6C10                                      | <i>snoRNA:Psi28S-1232-RA</i>  |                  |                    |                 |
| 6C10-6C10                                      | <i>tRNA:CR32740</i>           |                  |                    |                 |
| 6C10-6C10                                      | <i>tRNA:CR32740-RA</i>        |                  |                    |                 |
| 6C11-6C12                                      | CG14439                       | CG14439          |                    |                 |
| 6C12-6C13                                      | CG14438                       | CG14438          |                    | 13068           |
| <b>Deficiency <i>Df(1)BK10 (15F2-16C5)</i></b> |                               |                  |                    |                 |
| <b>Cytological location</b>                    | <b>GENE NUMBER/<br/>NAME</b>  | <b>CG NUMBER</b> | <b>Vienna RNAi</b> | <b>BL Stock</b> |
| 15F2-15F2                                      | CG8918                        | CG8918           | 28994              |                 |
| 15F3-15F3                                      | CG5070                        | CG5070           | 6150               |                 |
| 15F3-15F3                                      | CG32564                       | CG32564          |                    |                 |

|             |                   |         |       |       |
|-------------|-------------------|---------|-------|-------|
| 15F3-15F3   | CG32563           | CG32563 |       |       |
| 15F3-15F3   | CG12995           | CG12995 |       |       |
| 15F3-15F4   | CG18258           | CG18258 | 20621 |       |
| 15F4-15F4   | CG5162            | CG5162  |       |       |
| 15F4-15F4   | CG12998           | CG12998 |       |       |
| 15F4-15F4   | CG5172            | CG5172  |       |       |
| 15F4-15F4   | CG12997           | CG12997 |       |       |
| 15F4-15F4   | CG34327           | CG34327 |       |       |
| 15F4-15F4   | CG10598           | CG10598 |       |       |
| 15F4-15F4   | CG10597           | CG10597 | 6157  |       |
| 15F4-15F4   | CG8915            | CG8915  | 28857 |       |
| 15F4-15F4   | CG8675            | CG8675  | 26997 |       |
| 15F4-15F4   | CG12996           | CG12996 |       |       |
| 15F4-15F7   | <i>f</i>          | CG42864 | 33200 |       |
| 15F7-15F7   | CG8664            | CG8664  | 47568 |       |
| 15F7-15F7   | CG8661            | CG8661  |       |       |
| 15F8-16A1   | <i>Fim</i>        | CG86401 | 47514 | 19171 |
| 16A1-16A1   | CG5445            | CG5445  |       | 14274 |
| 16A1-16A1   | <i>B-H2</i>       | CG5488  |       | 11437 |
| 16A4-16A5   | <i>B-H1</i>       | CG5529  |       |       |
| 16A5-16A5   | CG8611            | CG8611  | 28936 |       |
| 16A5-16A5   | CG12994           | CG12994 | 11864 |       |
| 16A5-16A5   | CG5613            | CG5613  | 24694 | 18602 |
| 16A5-16A5   | CG12993           | CG12993 | 20304 |       |
| 16A5-16A5   | CG8568            | CG8568  |       |       |
| 16A5-16B1   | CG8557            | CG8557  | 28927 | 18715 |
| 16B3-16B3   | CG12432           | CG12432 |       |       |
| 16B4-16B4   | <i>ppk23</i>      | CG8527  | 39580 |       |
| 16B5-16B6   | <i>l(1)G0222</i>  |         | 24107 |       |
| 16B6-16B7   | CG12991           | CG12991 |       | 10234 |
| 16B6-16B6   | CG12992           | CG12992 |       |       |
| 16B7-16B7   | <i>X11L</i>       | CG5675  | 27479 | 18147 |
| 16B9-16B9   | CG8408            | CG8408  | 12432 |       |
| 16B9-16B10  | CG8326            | CG8326  | 23760 |       |
| 16B10-16B10 | CG8316            | CG8316  |       | 19865 |
| 16B10-16B10 | CG5703            | CG5703  | 10140 |       |
| 16B10-16B10 | CG8289            | CG8289  | 24279 | 19336 |
| 16B10-16B10 | CG5800            | CG5800  | 27519 |       |
| 16B10-16B10 | <i>RhoGAPp190</i> | CG32555 |       | 20177 |
| 16B10-16B10 | CG8211            | CG8211  | 24329 | 12545 |
| 16B10-16B12 | <i>beta-Spec</i>  | CG5870  | 42083 | 13310 |
| 16B12-16B12 | CG12990           | CG12990 | 6160  |       |
| 16B12-16C1  | CG32556           | CG32556 |       |       |
| 16C1-16C1   | CG8188            | CG8188  |       | 11439 |
| 16C1-16C1   | <i>par-6</i>      | CG5884  | 19730 |       |
| 16C1-16C1   | CG8173            | CG8173  | 35845 |       |

| 16C1-16C8                                           | CG32560                      | CG32560          | 20983              | 12700           |
|-----------------------------------------------------|------------------------------|------------------|--------------------|-----------------|
| 16C5-16C5                                           | CG32559                      |                  |                    |                 |
| 16C5-16C6                                           | CG15816                      | CG15816          | 19616              |                 |
| <b>Deficiency <i>Df(2L)Exel6011 (25C7-25D5)</i></b> |                              |                  |                    |                 |
| <b>Cytological location</b>                         | <b>GENE NUMBER/<br/>NAME</b> | <b>CG NUMBER</b> | <b>Vienna RNAi</b> | <b>BL Stock</b> |
| 25C7-25C10                                          | <i>Msp-300</i>               | CG33715          |                    | 13707           |
| 25C9-25C9                                           | <i>snoRNA:Psi28S-2263</i>    |                  |                    |                 |
| 25C9-25C9                                           | <i>snoRNA:Psi28S-2263-RA</i> |                  |                    |                 |
| 25C9-25C9                                           | <i>snmRNA:765</i>            |                  |                    |                 |
| 25C9-25C9                                           | <i>snmRNA:765-RA</i>         |                  |                    |                 |
| 25C10-25C10                                         | <i>snmRNA:128</i>            |                  |                    |                 |
| 25C10-25C10                                         | <i>snmRNA:128-RA</i>         |                  |                    |                 |
| 25C10-25C10                                         | <i>snoRNA:Psi18S-525k-RA</i> |                  |                    |                 |
| 25C10-25C10                                         | <i>snoRNA:Psi18S-525k</i>    |                  |                    |                 |
| 25C10-25C10                                         | <i>snmRNA:158</i>            |                  |                    |                 |
| 25C10-25C10                                         | <i>snmRNA:158-RA</i>         |                  |                    |                 |
| 25C10-25C10                                         | <i>Cyp28d2</i>               | CG6081           | 7868               |                 |
| 25C10-25C10                                         | <i>Cyp28d1</i>               | CG10833          | 7870               |                 |
| 25C10-25D1                                          | CG7742                       | CG7742           | 25535              |                 |
| 25D1-25D1                                           | CG14034                      | CG14034          | 25536              |                 |
| 25D1-25D1                                           | <i>TpnC25D</i>               | CG6514           | 27649              |                 |
| 25D1-25D2                                           | <i>tkv</i>                   | CG14026          | 3059               |                 |
| 25D2-25D2                                           | <i>tRNA:CR31971</i>          |                  |                    |                 |
| 25D2-25D2                                           | <i>tRNA:CR31971-RA</i>       |                  |                    |                 |
| 25D2-25D2                                           | <i>tRNA:CR31914</i>          |                  |                    |                 |
| 25D2-25D2                                           | <i>tRNA:CR31914-RA</i>       |                  |                    |                 |
| 25D2-25D2                                           | CG14033                      | CG14033          |                    | 14403           |
| 25D2-25D2                                           | <i>Cyp4ac1</i>               | CG14032          |                    |                 |
| 25D2-25D2                                           | <i>Cyp4ac2</i>               | CG17970          | 16987              |                 |
| 25D2-25D2                                           | <i>Cyp4ac3</i>               | CG14031          | 48920              |                 |
| 25D2-25D3                                           | <i>Bsg25D</i>                | CG14025          | 13398              |                 |
| 25D3-25D3                                           | <i>Bub1</i>                  | CG14030          | 24833              |                 |
| 25D4-25D5                                           | <i>vri</i>                   | CG14029          | 5650               |                 |
| 25D5-25D5                                           | CG14024                      | CG14024          | 13402              |                 |
| 25D5-25D6                                           | CG14023                      | CG14023          | 36480              |                 |
| <b>Deficiency <i>Df(3L)h-i22 (66D10-66D12)</i></b>  |                              |                  |                    |                 |
| <b>Cytological location</b>                         | <b>GENE NUMBER/<br/>NAME</b> | <b>CG NUMBER</b> | <b>Vienna RNAi</b> | <b>BL Stock</b> |
| 66D10-66D10                                         | CG6486                       | CG6486           | 43804              |                 |
| 66D10-66D10                                         | <i>h</i>                     | CG6494           |                    | 11730           |
| 66D11-66D11                                         | <i>SrpRbeta</i>              | CG33162          | 5150               | 12072           |
| 66D11-66D11                                         | CG32022                      | CG32022          | 10105              |                 |

|             |                                                      |                |       |       |
|-------------|------------------------------------------------------|----------------|-------|-------|
| 66D11-66D12 | <i>CG6511</i>                                        | <i>CG6511</i>  |       |       |
| 66D12-66D12 | <i>Cp18</i>                                          | <i>CG6517</i>  | 39622 |       |
| 66D12-66D12 | <i>Cp15</i>                                          | <i>CG6519</i>  | 13860 |       |
| 66D12-66D12 | <i>Cp19</i>                                          | <i>CG6524</i>  | 33286 |       |
| 66D12-66D12 | <i>Cp16</i>                                          | <i>CG6533</i>  | 19870 |       |
| 66D12-66D12 | <i>Prm</i>                                           | <i>CG5939</i>  |       | 11752 |
| 66D12-66D12 | <i>CG13306</i>                                       | <i>CG13306</i> | 44960 |       |
| 66D12-66D12 | <i>CG6576</i>                                        | <i>CG6576</i>  | 26695 |       |
| 66D12-66D15 | <i>Fhos</i>                                          | <i>CG32030</i> |       | 16022 |
| 66D14-66D14 | From <i>CG5804</i> in overlap def BL 8702-not lethal | <i>CG5804</i>  | 23587 |       |
| 66D15-66D15 | <i>CG13310</i>                                       | <i>CG13310</i> | 43960 |       |
| 66D15-66D15 | <i>CG13311</i>                                       | <i>CG13311</i> | 51574 |       |
| 66D15-66D15 | <i>CG34426</i>                                       | <i>CG34426</i> |       |       |
| 66D15-66D15 | <i>CG32023</i>                                       | <i>CG32023</i> |       |       |
| 66D15-66D15 | <i>CG34427</i>                                       | <i>CG34427</i> |       |       |
| 66D15-66D15 | <i>CG13312</i>                                       | <i>CG13312</i> |       |       |
| 66D15-66D15 | <i>CG32024</i>                                       | <i>CG32024</i> |       |       |
| 66D15-66D15 | <i>CG13308</i>                                       | <i>CG13308</i> |       |       |
| 66D15-66D15 | <i>CG13309</i>                                       | <i>CG13309</i> |       |       |
| 66E1-66E3   | <i>dally</i>                                         | <i>CG4974</i>  |       |       |
| 66E1-66E1   | <i>CG32026</i>                                       | <i>CG32026</i> |       |       |

**Deficiency *Df(3R)e-R1 (93B7-93D3)***

| <b>Cytological location</b> | <b>GENE NUMBER/ NAME</b> | <b>CG NUMBER</b> | <b>Vienna RNAi</b> | <b>BL Stock</b> |
|-----------------------------|--------------------------|------------------|--------------------|-----------------|
| 93B5-93B7                   | <i>Dhc93AB</i>           | <i>CG3723</i>    | 41947              |                 |
| 93B7-93B7                   | <i>CG12278</i>           | <i>CG12278</i>   | 29484              |                 |
| 93B7-93B7                   | <i>CG31189</i>           | <i>CG31189</i>   | 22962              |                 |
| 93B7-93B7                   | <i>CG31207</i>           | <i>CG31207</i>   |                    |                 |
| 93B7-93B7                   | <i>CG7079</i>            | <i>CG7079</i>    |                    |                 |
| 93B7-93B7                   | <i>CG17279</i>           | <i>CG17279</i>   |                    |                 |
| 93B7-93B8                   | <i>Mvl</i>               | <i>CG3671</i>    | 44000              | 19886           |
| 93B8-93B9                   | <i>Cortactin</i>         | <i>CG3637</i>    |                    | 22381           |
| 93B9-93B10                  | <i>AnnIX</i>             | <i>CG5730</i>    | 27493              |                 |
| 93B10-93B10                 | <i>r-l</i>               | <i>CG3593</i>    | 21688              | 17982           |
| 93B10-93B10                 | <i>dmrt93B</i>           | <i>CG5737</i>    | 41048              |                 |
| 93B10-93B10                 | <i>CG7056</i>            | <i>CG7056</i>    |                    | 17943           |
| 93B10-93B11                 | <i>RhoGAP93B</i>         | <i>CG3421</i>    | 41934              | 19720           |
| 93B11-93B12                 | <i>CG7044</i>            | <i>CG7044</i>    | 27811              | 12413           |
| 93B12-93B12                 | <i>CG5745</i>            | <i>CG5745</i>    | 35034              |                 |
| 93B12-93B12                 | <i>sec15</i>             | <i>CG7034</i>    |                    |                 |
| 93B12-93B12                 | <i>rtet</i>              | <i>CG5760</i>    | 44002              | 11714           |
| 93B12-93B13                 | <i>Rab11</i>             | <i>CG5771</i>    | 22198              | 12418           |
| 93B13-93B13                 | <i>ppan</i>              | <i>CG5786</i>    | 39001              | 11557           |

|             |                    |                |       |       |
|-------------|--------------------|----------------|-------|-------|
| 93B13-93B13 | <i>CG17282</i>     | <i>CG17282</i> |       |       |
| 93B13-93C1  | <i>slmb</i>        | <i>CG3412</i>  |       | 11493 |
| 93C1-93C1   | <i>CG5793</i>      | <i>CG5793</i>  | 47883 | 16067 |
| 93C1-93C1   | <i>Obp93a</i>      | <i>CG17284</i> | 2558  |       |
| 93C1-93C1   | <i>CG10825</i>     | <i>CG10825</i> | 31360 |       |
| 93C1-93C1   | <i>CG7009</i>      | <i>CG7009</i>  | 27790 | 18008 |
| 93C1-93C1   | <i>CG5798</i>      | <i>CG5798</i>  | 8931  |       |
| 93C1-93C1   | <i>CG5802</i>      | <i>CG5802</i>  | 6801  | 13460 |
| 93C1-93C5   | <i>SNF4Agamma</i>  | <i>CG17299</i> |       | 13088 |
| 93C2-93C2   | <i>CG10824</i>     | <i>CG10824</i> | 16588 |       |
| 93C2-93C2   | <i>CG5810</i>      | <i>CG5810</i>  | 44988 |       |
| 93C2-93C2   | <i>CG7000</i>      | <i>CG7000</i>  | 42496 |       |
| 93C6-93C6   | <i>CG5862</i>      | <i>CG5862</i>  | 45155 |       |
| 93C6-93C6   | <i>CG3353</i>      | <i>CG3353</i>  | 41920 | 7353  |
| 93C6-93C7   | <i>CG5871</i>      | <i>CG5871</i>  | 41822 | 13618 |
| 93C7-93C7   | <i>CG3337</i>      | <i>CG3337</i>  | 29170 |       |
| 93C7-93C7   | <i>NELF-A</i>      | <i>CG5874</i>  | 43211 | 15189 |
| 93C7-93D1   | <i>e</i>           | <i>CG3331</i>  | 45689 |       |
| 93D1-93D1   | <i>CG5892</i>      | <i>CG5892</i>  | 6807  | 18496 |
| 93D1-93D2   | <i>ETHR</i>        | <i>CG5911</i>  | 42716 |       |
| 93D2-93D2   | <i>Rab1</i>        | <i>CG3320</i>  |       | 17936 |
| 93D2-93D2   | <i>AP-2sigma</i>   | <i>CG6056</i>  | 34148 | 13478 |
| 93D2-93D2   | <i>CG5919</i>      | <i>CG5919</i>  | 28402 |       |
| 93D2-93D2   | <i>CG3308</i>      | <i>CG3308</i>  | 43756 |       |
| 93D2-93D2   | <i>CG3301</i>      | <i>CG3301</i>  | 43255 | 18137 |
| 93D2-93D4   | <i>SIFR</i>        | <i>CG10823</i> | 1783  | 16202 |
| 93D3-93D3   | <i>CG17298</i>     | <i>CG17298</i> |       |       |
| 93D4-93D4   | <i>Hsromega-RB</i> |                |       |       |
| 93D4-93D4   | <i>Hsromega</i>    |                |       |       |
| 93D4-93D4   | <i>Hsromega-RA</i> |                |       |       |
| 93D4-93D4   | <i>Hsromega-RC</i> |                |       |       |
