# Supplementary material for: The Mitochondrial Chaperone Protein TRAP1 Mitigates α-Synuclein Toxicity
Source: PubMed Central journal article supplement (PMC3271059; doi:10.1371/journal.pgen.1002488), 2012-02-02
Supplement: pgen.1002488.s012.pdf [file pgen.1002488.s012.pdf]

**Table S4.** Deficiencies causing a decline in DA

| <b>Deficiency</b>    | <b>Candidate region</b> | <b>Head DA (4 week as % 1 week)</b> |
|----------------------|-------------------------|-------------------------------------|
| <i>Df(1)ct-J4</i>    | 7A2-3;7C1               | 26.82                               |
| <i>Df(1)4b18</i>     | 14B8;14C1               | 47.44                               |
| <i>Df(2L)ast2</i>    | 21D1-2;22B23            | 47.06                               |
| <i>Df(2L)spd[j2]</i> | 27C1-2;28A              | 47.48                               |
| <i>Df(2L)Mdh</i>     | 30D-30F;31F             | 29.62                               |
| <i>Df(2L)BSC32</i>   | 32A1-2;32C5-D1          | 31.34                               |
| <i>Df(2L)BSC147</i>  | 34C1;34C6               | 27.51                               |
| <i>Df(2R)nap9</i>    | 42A1-2;42E6-F1          | 19.81                               |
| <i>Df(2R)H3E1</i>    | 44D1-4;44F12            | 49.94                               |
| <i>Df(2R)w45-30n</i> | 45A6-7;45E2-3           | 47.2                                |
| <i>Df(2R)BSC161</i>  | 54B2;54B17              | 21.48                               |
| <i>Df(2R)BSC45</i>   | 54C8-D1;54E2-7          | 46.81                               |
| <i>Df(2R)P34</i>     | 55E2-4;56C1-11          | 49.94                               |
| <i>Df(2R)59AD</i>    | 59A1-3;59D1-4           | 41.00                               |
| <i>Df(2R)vir130</i>  | 59B;59D8-E1             | 39.85                               |
| <i>Df(3L)ZN47</i>    | 64C;65C                 | 40.69                               |
| <i>Df(3L)XDI98</i>   | 65A2;65E1               | 24.71                               |
| <i>Df(3L)BSC33</i>   | 65E10-F1;65F2-6         | 41.51                               |
| <i>Df(3L)vin7</i>    | 68C8-11;69B4-5          | 26.11                               |
| <i>Df(3R)Scr</i>     | 84A1-2;84B1-2           | 29.55                               |
| <i>Df(3R)p-XT103</i> | 85A2;85C1-2             | 46.60                               |
| <i>Df(3R)by10</i>    | 85D8-12;85E7-F1         | 45.14                               |
| <i>Df(3R)BSC137</i>  | 94F1;95A4               | 48.79                               |
| <i>C(4)RM</i>        | 101F1;102F8             | 33.43                               |
