# Supplementary material for: The Mitochondrial Chaperone Protein TRAP1 Mitigates α-Synuclein Toxicity
Source: PubMed Central journal article supplement (PMC3271059; doi:10.1371/journal.pgen.1002488), 2012-02-02
Supplement: pgen.1002488.s013.pdf [file pgen.1002488.s013.pdf]

**Table S5.** Primers

|                       |                                              |
|-----------------------|----------------------------------------------|
| Fly $\beta$ -Actin5c  | for: 5'-ccagtcattccttcaaacc-3                |
|                       | rev: 5'-gcaacttcttcgtcacacatt-3              |
| Fly TRAP1             | for: 5'-aggcagagtcaccgatcc-3'                |
|                       | rev: 5'-tgatgcctgcttggctc-3'                 |
| Human 18S             | Quantitect primers (Qiagen, Germany)         |
| hTRAP1                | for: 5'-cagaccaatgccgagaaag-3'               |
|                       | rev: 5'-caccagctcttctgtgtca-3'               |
| hTRAP1- <i>Bgl</i> II | for: 5'-gaagatctatggcgcgagctgcggcgctgtgc-3'  |
| hTRAP1- <i>Xho</i> I  | rev: 5'-ccgctcgagtcagtgctccagggccttgaca-3'   |
| TRAP1[D158N]          | for: 5'-ggcaccatcaccatccagaatactggatcggg-3`  |
|                       | rev: 5'-cccgataccagtattctggatggtgatggtgcc-3` |
